# Supplementary material for: Unravelling the RNA-Binding Properties of SAFB Proteins in Breast Cancer Cells
Source: Hindawi journal article supplement (doi:10.1155/2015/395816), 2015-01-01

A

| Lane                        | 1 | 2 | 3 | 4 | 5 |
|-----------------------------|---|---|---|---|---|
| UV (150mJ/cm <sup>2</sup> ) | + | + | + | + | + |
| Protein                     | A | A | G | G | A |
| α-Sam68                     | - | - | - | - | + |
| α-SAFB1                     | + | + | + | + | - |
| RNase                       | H | L | H | L | L |

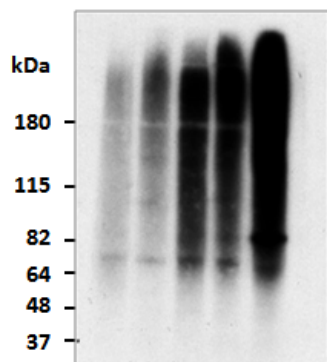

← SAFB1

B

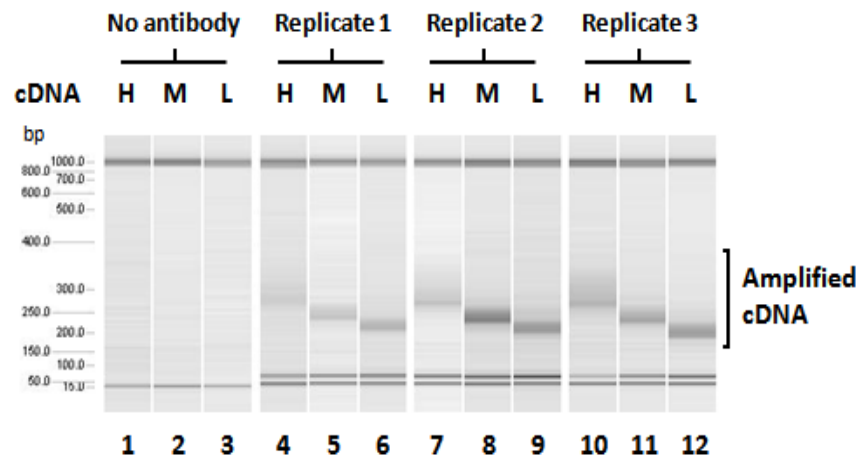

C

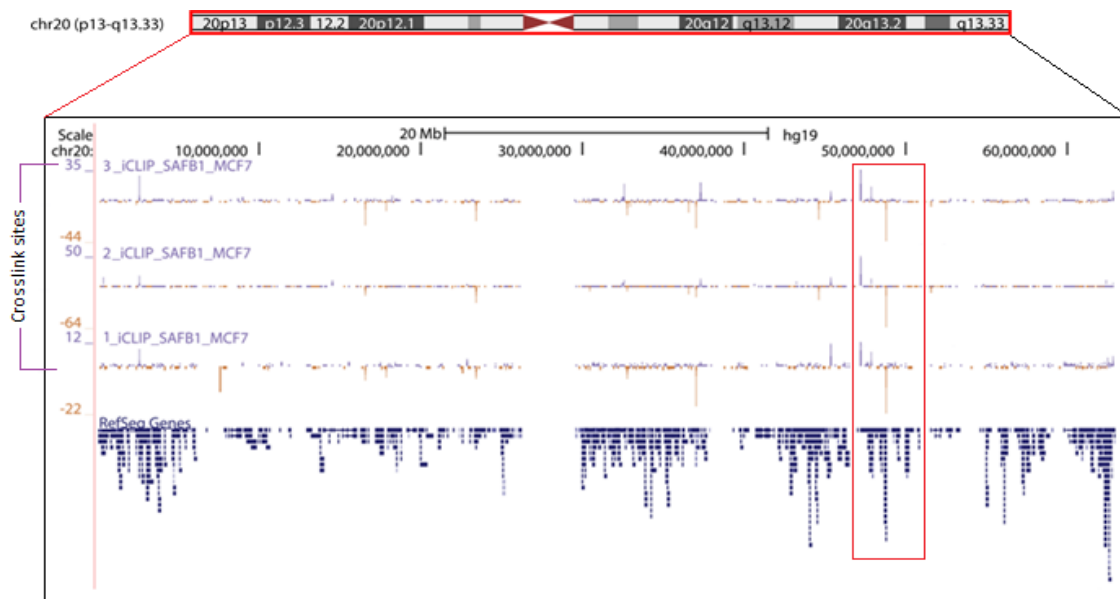

A

## RNAmap exon-intron

Top 10 junctions with largest x-link sites

| position of [junction] | span (upstream; downstream) | associated gene | [x-link sites] (same; anti) |
|------------------------|-----------------------------|-----------------|-----------------------------|
| chr2:85133785@-        | -173; 300                   | C2orf89         | 0; 101                      |
| chr5:76129052@+        | -269; 287                   | F2RL1           | 87; 0                       |
| chr15:45490968@-       | -165; 300                   | SHF             | 68; 0                       |
| chr7:139025365@+       | -85; 256                    | C7orf55         | 66; 1                       |
| chr14:102453100@+      | -300; 300                   | DYNC1H1         | 63; 0                       |
| chr11:62296095@-       | -300; 300                   | AHNAK           | 62; 0                       |
| chr1:45241812@+        | -253; 174                   | RPS8            | 51; 0                       |
| chr14:56079289@+       | -277; 300                   | KTN1            | 46; 0                       |
| chr11:62288933@-       | -61; 300                    | AHNAK           | 43; 0                       |
| chr17:38600336@+       | -175; 300                   | IGFBP4          | 40; 0                       |

B

## RNAmap 5-ncRNA

Top 10 junctions with largest x-link sites

| position of [junction] | span (upstream; downstream) | associated gene                | [x-link sites] (same; anti) |
|------------------------|-----------------------------|--------------------------------|-----------------------------|
| chr11:65269806@+       | -1000; 29                   | MALAT1                         | 220; 0                      |
| chr14:20811565@-       | -1000; 166                  | RNaseP_nuc-<br>ENSG00000252678 | 146; 1                      |
| chr9:35658013@-        | -429; 132                   | RNase_MRP-<br>ENSG00000199916  | 113; 2                      |
| chr10:17276831@-       | -1000; 66                   | RP11-124N14.3                  | 0; 111                      |
| chr3:58156362@-        | -1000; 70                   | RP11-456N14.2                  | 0; 103                      |
| chr16:3202679@-        | -1000; 36                   | AC108134.5                     | 0; 102                      |
| chr2:27273131@-        | -1000; 42                   | AC013472.6                     | 0; 101                      |
| chr11:62609280@-       | -1000; 95                   | U2-<br>ENSG00000222328         | 98; 1                       |
| chr6:28864306@+        | -1000; 100                  | HCG14                          | 1; 93                       |
| chr8:67025246@-        | -1000; 36                   | AC084082.1                     | 0; 84                       |

# Supplementary Figure 3

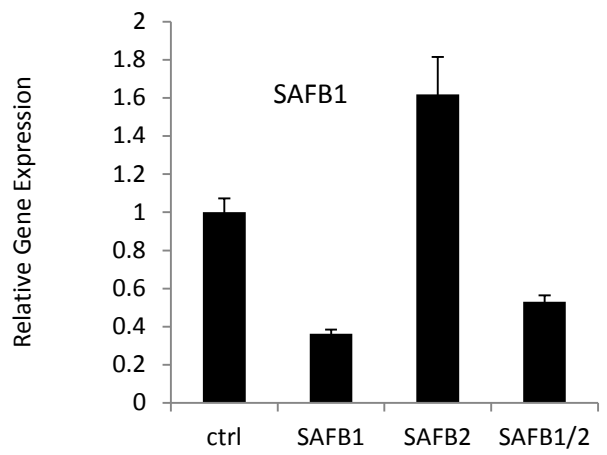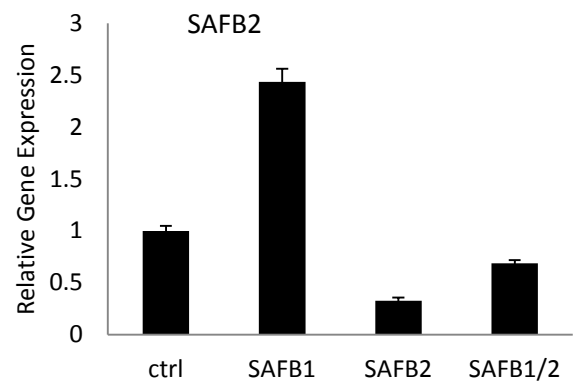

# Supplementary Figure 4

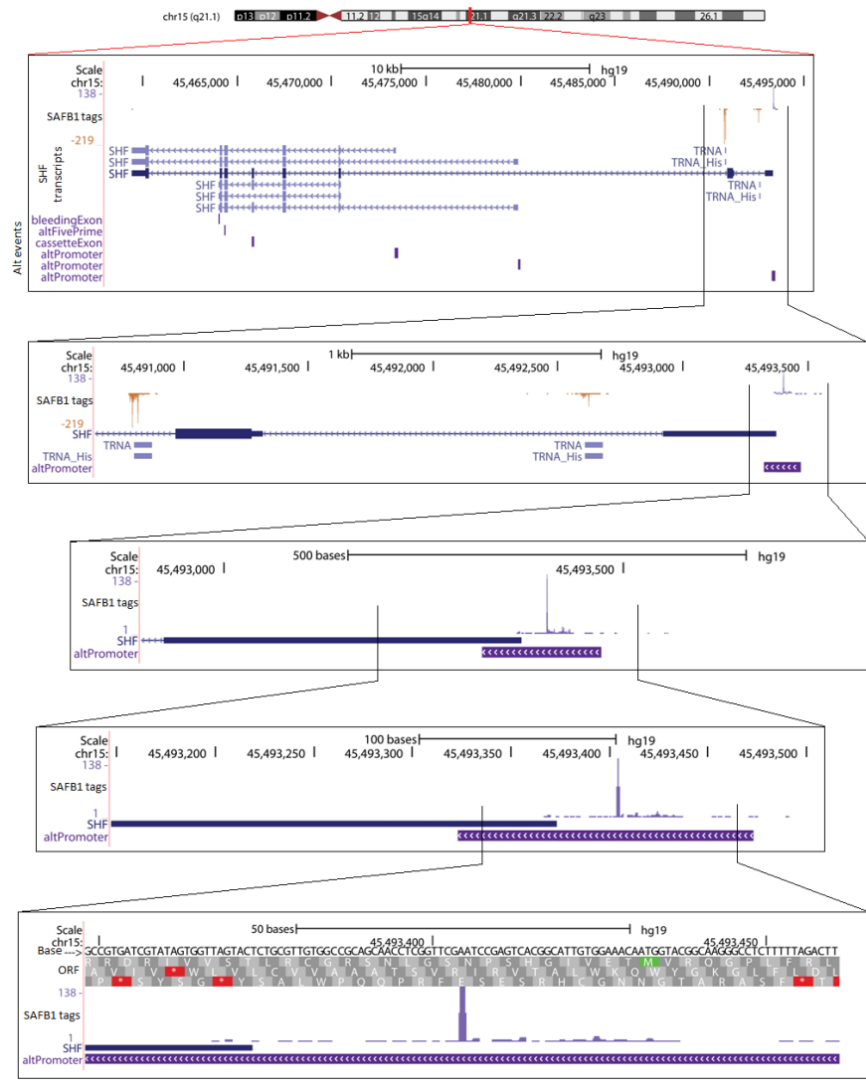

Supplement: f1 [file 395816.f1.pdf]
